# Supplementary material for: Urinary Phthalate Metabolites and Biomarkers of Oxidative Stress in Pregnant Women: A Repeated Measures Analysis
Source: PubMed Central journal article supplement (PMC4348741; doi:10.1289/ehp.1307996), 2014-11-14
Supplement: ehp.1307996.s001.508.pdf [file ehp.1307996.s001.508.pdf]

**Supplemental Material**

**Urinary Phthalate Metabolites and Biomarkers of Oxidative Stress  
in Pregnant Women: A Repeated Measures Analysis**

Kelly K. Ferguson, Thomas F. McElrath, Yin-Hsiu Chen, Bhramar Mukherjee, and John D.

Meeker

**Table S1.** Demographic characteristics in weighted study population including only subjects with complete covariates included in adjusted regression models<sup>a</sup> (N=464).

| <b>Characteristic</b>                           | <b>Percent</b> |
|-------------------------------------------------|----------------|
| <b>Race/ethnicity (N=464)</b>                   |                |
| White                                           | 60             |
| African American                                | 15             |
| Other                                           | 25             |
| <b>Education (N=464)</b>                        |                |
| High school                                     | 14             |
| Technical school                                | 15             |
| Junior college or some college                  | 29             |
| College graduate                                | 41             |
| <b>Health insurance (N=464)</b>                 |                |
| Private/HMO/self-pay                            | 82             |
| Medicaid/SSI/MassHealth                         | 18             |
| <b>Body mass index at visit 1 (N=461)</b>       |                |
| <25 kg/m <sup>2</sup> (underweight to normal)   | 53             |
| 25-30 kg/m <sup>2</sup> (overweight)            | 27             |
| ≥30 kg/m <sup>2</sup> (obese to morbidly obese) | 20             |
| <b>Smoking during pregnancy (N=464)</b>         |                |
| Some                                            | 6              |
| None                                            | 94             |
| <b>Alcohol use during pregnancy (N=460)</b>     |                |
| Some                                            | 5              |
| None                                            | 95             |
| <b>Parity (N=464)</b>                           |                |
| Nulliparous                                     | 46             |
| Parous                                          | 54             |

HMO, health maintenance organization, SSI, supplemental security income. Distributions of demographic characteristics created from inverse probability weightings for case-control status.

<sup>a</sup>Covariates included in final statistical models were not the same as those described in Table S1.

Covariates for final models included: urinary specific gravity, gestational age at sample collection, race/ethnicity, education level, health insurance provider, body mass index (time-varying), time of day of urine sample collection, and parity of infant.

**Table S2.** Urinary phthalate metabolite concentrations (geometric mean and geometric standard deviation) by categorical demographic characteristics in all samples measured from weighted population (N=1678 samples, N=482 subjects).

| Characteristic                        | MEHHP<br>(µg/L) | MEOHP<br>(µg/L) | MECPP<br>(µg/L) | ΣDEHP<br>(µmol/L) | MBzP<br>(µg/L) | MiBP<br>(µg/L) | MEP<br>(µg/L) | MCPP<br>(µg/L) |
|---------------------------------------|-----------------|-----------------|-----------------|-------------------|----------------|----------------|---------------|----------------|
| <b>Race/ethnicity</b>                 |                 |                 |                 |                   |                |                |               |                |
| White (Ref.)                          | 35.8 (2.11)     | 18.9 (2.03)     | 43.9 (2.02)     | 0.39 (1.91)       | 5.67 (1.63)    | 6.28 (1.33)    | 111 (3.06)    | 2.00 (1.78)    |
| African-American                      | 35.8 (2.13)     | 18.4 (2.16)     | 42.8 (2.22)     | 0.40 (2.05)       | 10.5 (1.90)*   | 11.2 (1.36)*   | 285 (3.04)*   | 2.49 (2.38)    |
| Other                                 | 29.9 (2.11)     | 16.9 (2.06)     | 42.9 (2.27)     | 0.37 (1.98)       | 9.31 (2.15)*   | 9.44 (1.47)*   | 165 (3.26)*   | 2.13 (2.02)    |
| <b>Education</b>                      |                 |                 |                 |                   |                |                |               |                |
| High school (Ref.)                    | 27.8 (1.76)     | 15.2 (1.79)     | 37.0 (1.94)     | 0.32 (1.74)       | 15.6 (2.30)    | 10.7 (1.25)    | 286 (3.22)    | 2.52 (2.04)    |
| Technical school                      | 30.0 (2.10)     | 15.5 (2.07)     | 34.7 (2.11)     | 0.32 (1.98)       | 8.18 (1.97)*   | 9.45 (1.44)    | 197 (3.01)    | 2.10 (1.90)    |
| Junior college or some college        | 33.2 (2.29)     | 17.9 (2.21)     | 44.1 (2.23)     | 0.38 (2.01)       | 6.07 (1.72)*   | 6.43 (1.58)*   | 133 (3.10)*   | 1.99 (1.98)    |
| College graduate                      | 38.7 (2.10)     | 20.9 (2.00)     | 49.5 (2.06)     | 0.44 (1.93)       | 5.73 (1.59)*   | 7.05 (1.30)*   | 101 (3.04)*   | 2.06 (1.88)    |
| <b>Health insurance</b>               |                 |                 |                 |                   |                |                |               |                |
| Private insurance/HMO/Self-pay (Ref.) | 34.6 (2.21)     | 18.7 (2.13)     | 45.0 (2.18)     | 0.40 (2.00)       | 5.93 (1.66)    | 6.99 (1.43)    | 120 (3.20)    | 2.02 (1.92)    |
| Medicaid/SSI/MassHealth               | 30.7 (1.76)     | 16.1 (1.78)     | 36.4 (1.85)     | 0.33 (1.73)       | 15.9 (2.12)*   | 11.4 (1.24)*   | 295 (2.79)*   | 2.39 (1.75)    |
| <b>BMI at visit 1</b>                 |                 |                 |                 |                   |                |                |               |                |
| Less than 25 kg/m <sup>2</sup> (Ref.) | 33.7 (2.09)     | 18.3 (1.99)     | 43.5 (2.14)     | 0.38 (1.95)       | 6.58 (1.86)    | 7.08 (1.30)    | 116 (2.90)    | 1.95 (1.82)    |
| 25 to less than 30 kg/m <sup>2</sup>  | 34.0 (2.34)     | 17.7 (2.34)     | 41.4 (2.19)     | 0.38 (2.04)       | 6.08 (1.69)    | 7.89 (1.56)    | 162 (3.96)*   | 2.19 (2.06)    |
| Greater than 30 kg/m <sup>2</sup>     | 36.3 (1.94)     | 19.4 (1.90)     | 46.8 (1.96)     | 0.41 (1.82)       | 10.1 (1.88)*   | 8.88 (1.51)*   | 202 (3.18)*   | 2.38 (1.97)    |
| <b>Tobacco use</b>                    |                 |                 |                 |                   |                |                |               |                |
| Smoked during pregnancy (Ref.)        | 38.4 (1.71)     | 19.6 (1.65)     | 46.9 (1.64)     | 0.40 (1.64)       | 15.4 (1.75)*   | 9.06 (1.24)    | 177 (3.94)    | 3.55 (1.94)    |
| No smoking during pregnancy           | 33.7 (2.15)     | 18.1 (2.08)     | 43.2 (2.15)     | 0.38 (1.97)       | 6.76 (1.83)    | 7.56 (1.42)    | 140 (3.26)    | 2.03 (1.91)*   |
| <b>Alcohol use</b>                    |                 |                 |                 |                   |                |                |               |                |
| Alcohol use during pregnancy (Ref.)   | 58.3 (1.84)     | 31.2 (1.78)     | 81.1 (2.05)     | 0.65 (1.87)       | 5.33 (1.41)    | 8.38 (1.53)    | 138 (2.88)    | 2.79 (2.72)    |
| No alcohol use during pregnancy       | 32.9 (2.11)*    | 17.6 (2.05)*    | 41.8 (2.09)*    | 0.37 (1.93)       | 7.23 (1.89)*   | 7.61 (1.41)    | 143 (3.32)    | 2.07 (1.89)    |
| <b>Parity</b>                         |                 |                 |                 |                   |                |                |               |                |
| Nulliparous (Ref.)                    | 36.4 (2.14)     | 19.7 (2.08)     | 46.3 (2.13)     | 0.41 (1.96)       | 6.21 (1.79)    | 7.26 (1.43)    | 149 (3.16)    | 2.04 (1.90)    |
| Non-nulliparous                       | 32.4 (2.10)     | 17.2 (2.03)     | 41.3 (2.09)     | 0.36 (1.93)       | 7.87 (1.89)*   | 7.91 (1.39)    | 136 (3.40)    | 2.15 (1.95)    |

Ref., reference category. HMO, Health Maintenance Organization. SSI, Supplemental Security Income. BMI, body mass index.

\*p<0.05 for significant difference in biomarker concentration from reference category, estimated from weighted linear mixed model with random intercepts for subject ID. All biomarkers adjusted for urinary specific gravity.

**Table S3.** Percent difference (95% confidence intervals) in oxidative stress biomarker in association with interquartile range increase in phthalate metabolite level. Estimates from adjusted<sup>a</sup> linear mixed effect models with random intercepts for subject ID, including cases (N=405 samples, N=127 subjects) or controls only (N=1199 samples, N=337 subjects).

| Metabolite | Cases 8-OHdG<br>% difference (95% CI) | p      | Controls 8-OHdG<br>% difference (95% CI) | p      | Cases 8-Isoprostane<br>% difference (95% CI) | p      | Controls 8-Isoprostane<br>% difference (95% CI) | p      |
|------------|---------------------------------------|--------|------------------------------------------|--------|----------------------------------------------|--------|-------------------------------------------------|--------|
| MEHP       | 4.11 (-2.13, 10.8)                    | 0.202  | 2.77 (-0.47, 6.11)                       | 0.10   | 11.8 (1.27, 23.3)                            | 0.028  | 14.3 (8.15, 20.7)                               | <0.001 |
| MEHHP      | 6.90 (0.02, 14.3)                     | 0.050  | 8.07 (4.74, 11.5)                        | <0.001 | 11.8 (0.69, 24.1)                            | 0.038  | 15.2 (9.15, 21.5)                               | <0.001 |
| MEOHP      | 6.22 (-0.33, 13.2)                    | 0.064  | 7.15 (3.91, 10.5)                        | <0.001 | 10.9 (0.44, 22.5)                            | 0.042  | 15.5 (9.61, 21.7)                               | <0.001 |
| MECPP      | 6.14 (-0.76, 13.5)                    | 0.083  | 4.90 (2.23, 7.64)                        | <0.001 | 14.8 (3.02, 28.0)                            | 0.013  | 16.9 (11.9, 22.2)                               | <0.001 |
| ΣDEHP      | 6.08 (-0.61, 13.2)                    | 0.077  | 6.65 (3.22, 10.2)                        | <0.001 | 12.9 (1.92, 25.0)                            | 0.021  | 19.1 (12.6, 25.9)                               | <0.001 |
| MBzP       | 18.5 (7.60, 30.5)                     | 0.001  | 19.5 (14.6, 24.5)                        | <0.001 | 50.3 (27.4, 77.4)                            | <0.001 | 39.8 (29.8, 50.6)                               | <0.001 |
| MBP        | 8.92 (2.03, 16.3)                     | 0.011  | 17.5 (13.1, 22.2)                        | <0.001 | 30.9 (15.8, 48.0)                            | <0.001 | 40.7 (31.0, 51.0)                               | <0.001 |
| MiBP       | 20.3 (10.2, 31.3)                     | <0.001 | 30.3 (24.4, 36.5)                        | <0.001 | 52.5 (32.2, 76.0)                            | <0.001 | 56.4 (43.9, 69.9)                               | <0.001 |
| MEP        | 19.2 (10.3, 28.8)                     | <0.001 | 11.2 (7.12, 15.4)                        | <0.001 | 15.2 (0.70, 31.8)                            | 0.040  | 19.1 (11.5, 27.3)                               | <0.001 |
| MCPP       | 5.28 (-0.73, 11.6)                    | 0.087  | 7.11 (3.77, 10.6)                        | <0.001 | 19.2 (8.46, 31.1)                            | <0.001 | 19.9 (13.5, 26.6)                               | <0.001 |

8-OHdG, 8-hydroxydeoxyguanosine.<sup>a</sup>Adjusted for urinary specific gravity, gestational age at sample collection, race/ethnicity, education level, health insurance provider, body mass index (time-varying), time of day of urine sample collection (before vs. after 1pm, time-varying), and parity of infant.

**Table S4.** Percent difference (95% confidence intervals) in oxidative stress biomarker in association with interquartile range increase in phthalate metabolite level. All metabolites were included as predictors of one oxidative stress biomarker in each model. Estimates from adjusted<sup>a</sup> linear mixed effect models with random intercepts for subject ID (N=1604 samples, N=464 subjects).

| <b>Metabolite</b> | <b>8-OHdG<br/>% difference (95% CI)</b> | <b>p</b> | <b>8-Isoprostane<br/>% difference (95% CI)</b> | <b>p</b> |
|-------------------|-----------------------------------------|----------|------------------------------------------------|----------|
| ΣDEHP             | 2.98 (-0.53, 6.60)                      | 0.10     | 9.49 (3.25, 16.1)                              | 0.003    |
| MBzP              | 13.3 (7.84, 19.1)                       | <0.001   | 21.8 (11.3, 33.2)                              | <0.001   |
| MBP               | 9.08 (4.08, 14.3)                       | <0.001   | 20.4 (10.5, 31.2)                              | <0.001   |
| MEP               | 8.46 (4.41, 12.7)                       | <0.001   | 12.0 (4.71, 19.7)                              | 0.001    |
| MCPP              | 1.60 (-1.92, 5.24)                      | 0.38     | 7.75 (1.47, 14.4)                              | 0.015    |

8-OHdG, 8-hydroxydeoxyguanosine.<sup>a</sup>Adjusted for urinary specific gravity, gestational age at sample collection, race/ethnicity, education level, health insurance provider, body mass index (time-varying), time of day of urine sample collection (before vs. after 1pm, time-varying), and parity of infant. Models include inverse probability weights to adjust for case-control study design.
